# Supplementary material
Source: HighWire-hosted journal article supplement (https://bmjopen.bmj.com/content/11/3/e040616)
Supplement: inline-supplementary-material-1 [file inline-supplementary-material-1.pdf]

**Appendix A:** Search strategy for OVID Medline and EMBASE.

## MEDLINE

Database: OVID Medline Epub Ahead of Print, In-Process & Other Non-Indexed Citations, Ovid MEDLINE(R) Daily and Ovid MEDLINE(R) 1946 to Present

Search Strategy:

- 
- 1 exp Respiratory Tract Infections/ (352559)
  - 2 (respiratory adj3 infect\*).mp. [mp=title, abstract, original title, name of substance word, subject heading word, floating sub-heading word, keyword heading word, organism supplementary concept word, protocol supplementary concept word, rare disease supplementary concept word, unique identifier, synonyms] (75025)
  - 3 (influenza\* or flu).tw. (121359)
  - 4 (h1n1 or h5n1 or h3n2).tw. (25097)
  - 5 exp Coronavirus/ (11467)
  - 6 exp Coronavirus Infections/ (9776)
  - 7 (coronavir\* or coronovir\* or SARS or MERS or MERS-COV or SARS-COV or SARS-COV-2 or COV or NCOV or 2019nCOV or 2019-nCOV or COVID-19).mp. [mp=title, abstract, original title, name of substance word, subject heading word, floating sub-heading word, keyword heading word, organism supplementary concept word, protocol supplementary concept word, rare disease supplementary concept word, unique identifier, synonyms] (24352)
  - 8 or/1-7 (469619)
  - 9 ((throat or pharynx or pharyng\* or oral or oropharyng\* or nasal or nares or nasopharyng\*) adj3 (swab\* or detect\* or test or sample\* or specimen\* or diagnos\* or assay)).mp. (49581)
  - 10 8 and 9 (8147)
  - 11 exp Disease Transmission, Infectious/ (67129)
  - 12 (contamina\* or dispers\* or droplet\* or partic\* or aerosol\* or environment\* or transmiss\* or transmit or safety\* or commun\* or contagi\*).mp. (5570978)
  - 13 11 or 12 (5584372)
  - 14 10 and 13 (2488)

## EMBASE

Database: Embase <1974 to 2020 March 24>

Search Strategy:

- 
- 1 exp respiratory tract infection/ (385263)
  - 2 (respiratory adj3 infect\*).mp. (127592)
  - 3 (influenza\* or flu).tw. (139944)
  - 4 (h1n1 or h5n1 or h3n2).tw. (30836)
  - 5 exp coronavirinae/ (11209)
  - 6 exp Coronavirus infection/ (11152)
  - 7 (coronavir\* or coronovir\* or SARS or MERS or MERS-COV or SARS-COV or SARS-COV-2 or COV or NCOV or 2019nCOV or 2019-nCOV or COVID-19).mp. (28959)
  - 8 or/1-7 (491703)
  - 9 ((throat or pharynx or pharyng\* or oral or oropharyng\* or nasal or nares or nasopharyng\*) adj3 (swab\* or detect\* or test or sample\* or specimen\* or diagnos\* or assay)).mp. (80034)

- 10 8 and 9 (9252)
- 11 disease transmission/ (96856)
- 12 (contamina\* or dispers\* or droplet\* or partic\* or aerosol\* or environment\* or transmiss\* or transmit or safety\* or commun\* or contagi\*).mp. (7223561)
- 13 11 or 12 (7223561)
- 14 10 and 13 (3189)
